1 **Aggressiveness as a latent personality trait of domestic**  
2 **dogs: testing local independence and measurement**  
3 **invariance**

4 Conor Goold<sup>1\*</sup>, Ruth C. Newberry<sup>1</sup>

5 <sup>1</sup> Department of Animal and Aquacultural Sciences, Faculty of Biosciences, Norwegian  
6 University of Life Sciences, Ås, Akershus, Norway

7 \* Corresponding author: [conor.goold@nmbu.no](mailto:conor.goold@nmbu.no) (CG)

## 8 **Abstract**

9 Studies of animal personality attempt to uncover underlying or 'latent' personality traits  
10 that explain broad patterns of behaviour, often by applying latent variable statistical  
11 models (e.g. factor analysis) to multivariate data sets. Two integral, but infrequently  
12 confirmed, assumptions of latent variable models in animal personality are: i) behavioural  
13 variables are independent (i.e. uncorrelated) conditional on the latent personality traits  
14 they reflect (*local independence*), and ii) personality traits are associated with  
15 behavioural variables in the same way across individuals or groups of individuals  
16 (*measurement invariance*). We tested these assumptions using observations of aggression  
17 in four age classes (4 - 10 months, 10 months - 3 years, 3 - 6 years, over 6 years) of male  
18 and female shelter dogs (N = 4,743) in 11 different contexts. A structural equation model  
19 supported the hypothesis of two positively correlated personality traits underlying  
20 aggression across contexts: aggressiveness towards people and aggressiveness towards  
21 dogs (comparative fit index: 0.96; Tucker-Lewis index: 0.95; root mean square error of  
22 approximation: 0.03). Aggression across contexts was moderately repeatable (towards  
23 people: intraclass correlation coefficient (ICC) = 0.479; towards dogs: ICC = 0.303).  
24 However, certain contexts related to aggressiveness towards people (but not dogs) shared  
25 significant residual relationships unaccounted for by latent levels of aggressiveness.  
26 Furthermore, aggressiveness towards people and dogs in different contexts interacted  
27 with sex and age. Thus, sex and age differences in displays of aggression were not simple  
28 functions of underlying aggressiveness. Our results illustrate that the robustness of traits  
29 in latent variable models must be critically assessed before making conclusions about the  
30 effects of, or factors influencing, animal personality. Our findings are of concern because

31 inaccurate ‘aggressive personality’ trait attributions can be costly to dogs, recipients of  
32 aggression and society in general.

33

34 *Key words:* animal personality assessment; agonistic behaviour; shelter dogs;

35 measurement bias; behavioural phenotyping

## 36 **Introduction**

37 Studies of non-human animal personality demonstrate that animals show relatively  
38 consistent between-individual differences in behaviour, and that the behavioural  
39 phenotype is organised hierarchically into broad behavioural dimensions or personality  
40 traits (e.g. sociability, aggressiveness or boldness) that further exhibit inter-correlations to  
41 form behavioural syndromes (e.g. boldness with aggression; [1–5]). To interpret the  
42 complexity inherent in behavioural phenotypes, personality traits and behavioural  
43 syndromes are frequently inferred using latent variable statistical models [6], which  
44 reduce two or more measured variables (the *manifest* variables) into one or more lower-  
45 dimensional variables (the *latent* variables), following work in human psychology [7–10].

46

47 Many animal personality studies use *formative* models, such as principal components  
48 analysis, that construct composite variables comprised of linear combinations of manifest  
49 variables. However, formative models impose only weak assumptions about the  
50 relationships between latent variables and manifest variables [6,11]. For instance,  
51 formative models do not require manifest variables to be correlated with one another or  
52 illustrate internal consistency [11]. Because behavioural variables comprising personality  
53 traits are expected to correlate with each other [4], the utility of formative models to  
54 revealing underlying personality traits has been criticised in both animals [12,13] and  
55 humans [10,11,14,15]. Instead, researchers are increasingly using *reflective* models, such  
56 as factor analysis, including confirmatory approaches such as structural equation  
57 modelling (see [1,16–18]). Reflective models regress measured behaviours on one or

58 more latent variables, incorporating measurement error and possibilities to compare *a*  
59 *priori* competing hypotheses [1,16,19].

60

61 Whilst reflective models offer a powerful framework to examine the latent variable  
62 structure of animal behaviour [19], they impose certain assumptions on the interpretation  
63 and modelling of latent variables that have received scrutiny in human psychology but  
64 are rarely discussed in studies of animal personality. Two foundational assumptions are  
65 *local independence* and *measurement invariance*. Local independence implies that  
66 manifest variables should be independent of each other conditional on the latent variables  
67 [20,21]. For example, given a continuous latent variable  $\theta$  (e.g. boldness) and two binary  
68 manifest variables  $Y_1$  and  $Y_2$  that can take the values 0 and 1, the item response theory  
69 model asserts that  $P(Y_1 = 1, Y_2 = 1 | \theta) = P(Y_1 = 1 | \theta)P(Y_2 = 1 | \theta)$ . As such, the latent  
70 variables should ‘screen off’ any covariance between manifest variables. Measurement  
71 invariance implies that the latent variables function the same (i.e. are invariant or  
72 equivalent) in different subsets of a population or in the same individuals through time  
73 [21–25]. In the previous example, this means that the expected values of the manifest  
74 variables  $Y_1$  and  $Y_2$  should remain the same across different groups,  $\pi$  (e.g. sex or  
75 different populations), for any fixed value of the latent variable  $\theta_x$  e.g.  $E(Y_1 | \theta_x) =$   
76  $E(Y_1 | \theta_x, \pi)$ . For studies of personality, violations of local independence or measurement  
77 invariance highlight instances where the personality traits do not completely explain  
78 variation in the manifest variables, which may lead to misleading conclusions about the  
79 differences between individuals as a function of trait scores [25–27].

80

81 The goal of this study was evaluate local independence and measurement invariance in  
82 behavioural data on domestic dogs (*Canis lupus familiaris*). Dog personality has been of  
83 scientific interest for decades [28–30], both to predict the behaviour of dogs at future  
84 time points [31] and to elucidate behavioural traits pertinent to dogs’ domestication  
85 history [32–35]. Research on personality in dogs has led to different numbers and  
86 composition of hypothesised personality traits with little consensus on how such traits  
87 should be compared within and between studies [36–38]. Dog personality studies  
88 frequently involve collection of data on a wide range of behaviours and, as a result, latent  
89 variable models are popular to reduce behavioural data into personality traits or  
90 dimensions [29]. Importantly, the predictive value of personality assessments in dogs has  
91 been inconsistent [31,39–43], perhaps most prominently in shelter dog personality  
92 assessments (e.g. see [31] for a review). Assessments of aggression are of particular  
93 concern, where aggression has been divided into different aggressiveness traits, such as  
94 owner-, stranger-, dog- or animal-directed factors [29,37,44,45]. Improving inference  
95 about aggressiveness in dogs is important because dog bites are a serious public health  
96 concern [46], especially for animal shelters rehoming dogs to new owners, and aggressive  
97 behaviour is undesirable to many organisations using dogs for various working roles [47].

98

99 Evaluating local independence and measurement invariance could help refine applied  
100 personality assessments on dogs. Local independence may be violated in standardised test  
101 batteries (a common assessment method; [48–50]) because the sequential administration

102 of different behavioural subtests means that how dogs responds to one sub-test may  
103 influence their subsequent behavioural responses, as well as the responses of the dog  
104 handlers [31]. Identifying local independence could, thus, highlight which sub-tests can  
105 be interpreted as providing independent information. Local independence is also relevant  
106 to the development and analysis of dog personality questionnaires completed by dog  
107 owners, because the order in which the questions are presented or redundancy in the  
108 content of questions can lead to dependencies between participant responses not  
109 explained by the questionnaire's intended focus on the dog's behaviour [51].

110

111 Scientists are also concerned with understanding personality differences in dogs across a  
112 variety of conditions, including ontogeny, age, sex, breed and neuter status (e.g. [37, 42,  
113 52–54]). Evaluating measurement invariance in personality assessments would allow  
114 researchers to confirm whether differences between individuals or groups of individuals  
115 in personality assessments reflect credible differences in personality trait scores or  
116 whether additional, unaccounted for factors are driving the differences. While it may be  
117 unrealistic for measurement invariance to hold in all instances, it is important to establish  
118 whether it holds for personality traits across basic biological variables such as age and  
119 sex, which are generally applicable to dog populations undergoing personality assessment  
120 and have previously been found to show interactions with personality traits, including  
121 playfulness, sociability, curiosity and aggressiveness [33, 55]. However, apart from van  
122 den Berg *et al.* [18] who assessed measurement invariance across breed groups, no  
123 studies have confirmed measurement invariance or local independence for personality  
124 traits.

125

126 In this paper, we assessed local independence and measurement invariance of  
127 aggressiveness in shelter dogs using a large sample of data on inter-context aggressive  
128 behaviour. First, we decomposed observations of aggression towards people and dogs  
129 across contexts into separate aggressiveness traits. Secondly, we assessed whether  
130 aggression in different contexts remained associated beyond that explained by latent  
131 levels of aggressiveness, testing local independence. Thirdly, we investigated whether the  
132 probability of aggression in different contexts assumed to be underpinned by the same  
133 aggressiveness trait was measurement invariant with respect to sex and age groups.

134

135

136

## 137 **Materials & Methods**

### 138 **Subjects**

139 Observational data on the occurrence of aggression in 4,743 dogs were gathered from  
140 Battersea Dogs and Cats Home's (UK) observational and longitudinal dog behaviour  
141 assessment records (Table 1). The data were from a sample of dogs (N = 4,990) at the  
142 shelter's three rehoming centres during 2014 (including dogs that arrived during 2013 or  
143 left in 2015). We selected the records from all dogs that were at least 4 months old,



144 excluding younger dogs because they were more likely to be unvaccinated, more limited  
145 in their interactions at the shelter and may have been kennelled in different areas to older  
146 dogs. Although dogs were from a variety of heritages (including purebreds and  
147 mongrels), the analyses here did not explore breed differences because the accurate visual  
148 assessment of breed in dogs with unknown heritage has been refuted [56–58].

149

**Table 1. Demographic characteristics of the studied dogs.**

| <b>Variable</b>                                                           | <b>Mean <math>\pm</math> SD / N</b> |
|---------------------------------------------------------------------------|-------------------------------------|
| Average age at shelter (years; all $\geq$ 4 months of age)                | 3.75 $\pm$ 3.03                     |
| Total days at the shelter                                                 | 25.13 $\pm$ 41.53                   |
| Weight (average weight if multiple measurements; kg)                      | 19.06 $\pm$ 10.26                   |
| Rehoming centre: London / Old Windsor / Brands Hatch                      | 2897 / 1280 / 566                   |
| Males / females                                                           | 2749 / 1994                         |
| Neutered <sup>1</sup> before arrival / neutered at shelter / not neutered | 1218 / 1665 / 1502                  |
| Relinquished by owners / returned to shelter / strays                     | 2892 / 260 / 1591                   |

<sup>1</sup>358 dogs had unknown neuter status

150

## 151 **Shelter environment**

152 The shelter was composed of three different UK rehoming centres: a high-throughput,  
153 urban centre based at Battersea, London with capacity for approximately 150-200 dogs; a  
154 semi-rural/rural centre based at Old Windsor with capacity for approximately 100-150  
155 dogs; and a rural centre based at Brands Hatch with capacity for approximately 50 dogs.  
156 All dogs arrived in an intake area of their respective rehoming centre and, when  
157 considered suitable for adoption, were moved to a ‘rehoming’ area that was partially open  
158 to the public between 1000 h and 1600 h. All kennels were indoors. Kennels varied in

159 size, but were usually approximately 4m x 2m and included either a shelf and bedding  
160 alcove area, or a more secluded bedding area at the back of the kennel (see [59] for more  
161 details). At different times throughout the day, dogs had access to indoor runs behind  
162 their kennels. In each kennel block area, dogs were cared for (e.g. fed, exercised, kennel  
163 cleaned) by a relatively stable group of staff members, allowing the development of  
164 familiarity with staff members and offering some predictability for dogs after arrival at  
165 the shelter. Although data on the number of dogs in each kennel were incomplete, in the  
166 majority of cases dogs were kennelled singly for safety reasons. The shelter mainly  
167 operated between 0800 h and 1700 h each day. All dogs were socialised with staff and/or  
168 volunteers each day (often multiple times) except on rare occasions when it was deemed  
169 unsafe to handle a dog (when training/behavioural modification proceeded without  
170 physical contact). Dogs were provided water ad libitum and fed commercial complete dry  
171 and/or wet tinned food twice daily (depending on recommendations by veterinary staff).  
172 Dogs received daily tactile, olfactory and/or auditory enrichment/variety (e.g. toys,  
173 essential oils, classical music, time in a quiet ‘chill-out’ room).

174

## 175 **Data collection**

176 In the observational assessment procedure, trained shelter employees recorded  
177 observations of dog behaviour in a variety of contexts as part of normal shelter  
178 procedures. Behavioural observations pertaining to each context were completed using an  
179 ethogram specific to that context and recorded in a custom computer system. Multiple  
180 observations could be completed each day, although we retained only one observation in

181 each context per day (the least desirable behaviour on that day; see below). The ethogram  
182 code that best described a dog's behaviour in a particular context during an observation  
183 was recorded by selecting it from a series of drop-down boxes (one for each context).  
184 Although staff could also add additional information in character fields, a full analysis of  
185 those comments was beyond the scope of this study. The ethogram for each context  
186 represented a scale of behaviours ranging from desirable to undesirable considered by the  
187 shelter to be relevant to dog welfare and ease of adoption. Contexts had between 10 and  
188 16 possible behaviours to choose from, some of which overlapped between different  
189 contexts. Among the least desirable behaviours in each context was aggression towards  
190 either people or dogs (depending on context). Aggression was formally defined as  
191 “*Growls, snarls, shows teeth and/or snaps when seeing/meeting other people/dogs,*  
192 *potentially pulling or lunging towards them*”, distinguished from non-aggressive but  
193 reactive responses, defined as “*Barks, whines, howls and/or play growls when*  
194 *seeing/meeting other people/dogs, potentially pulling or lunging towards them*”.

195

196 Observation contexts included both onsite (at the shelter) and offsite (e.g. out in public  
197 parks) settings. For the analyses here, we excluded offsite contexts (which had separate  
198 observation categories) because these were less frequently recorded and offsite records  
199 were more likely to be completed using second-hand information (e.g. from volunteers  
200 taking the dog offsite). We focused on observations of aggression in nine core onsite  
201 contexts that were most frequently completed by trained staff members: i) *Handling*, ii)  
202 *In kennel*, iii) *Out of kennel*, iv) *Interactions with familiar people*, v) *Interactions with*  
203 *unfamiliar people*, vi) *Eating food*, vii) *Interactions with toys*, viii) *Interactions with*

204 *female dogs*, ix) *Interactions with male dogs*. For the *In kennel* and *Out of kennel*  
205 contexts, recording of aggression towards both people and dogs was possible. If both  
206 occurred at the same time, aggression towards people was recorded. Therefore, *In kennel*  
207 and *Out of kennel* were each divided to reflect aggression shown towards people and  
208 towards dogs only, respectively. This resulted in 11 aggression contexts (Table 2) used as  
209 manifest variables in structural equation models to investigate latent aggressiveness traits.  
210 The average number of days between successive observations across these contexts and  
211 across dogs was 3.27 (SD = 2.08), and dogs had an average of 9.77 (SD = 13.41)  
212 observations within each context (N = 416,860 observations in total across dogs, contexts  
213 and days). Observations were recorded in the category that best described the scenario.  
214 Nonetheless, certain contexts could occur closely in space and time, which were  
215 investigated for violations of local independence, as explained below.

216

**Table 2. Behavioural observation contexts in which each dog’s reactions were analysed for the presence or absence of aggression.**

| <b>Context</b>                      | <b>Definition</b>                                                                                                                                                                                                                                     |
|-------------------------------------|-------------------------------------------------------------------------------------------------------------------------------------------------------------------------------------------------------------------------------------------------------|
| Handling                            | Informal handling by people (e.g. stroking non-sensitive areas, touching the collar, fitting a harness or lead).                                                                                                                                      |
| In kennel towards people            | People approaching or walking past the kennel.                                                                                                                                                                                                        |
| In kennel towards dogs              | Dogs in neighbouring kennels or dogs walking past the kennel.                                                                                                                                                                                         |
| Interactions with familiar people   | When outside the kennel and familiar people (interacted with at least once before) approach, make eye contact, speak to or attempt to make physical contact with the dog.                                                                             |
| Interactions with unfamiliar people | When outside the kennel and unfamiliar people (never interacted with before) approach, make eye contact, speak to or attempt to make physical contact with the dog.                                                                                   |
| Out of kennel towards people        | When around people outside the kennel who may be a long distance away and who make no attempt to engage with the dog.                                                                                                                                 |
| Out of kennel towards dogs          | When around dogs outside the kennel that may be a long distance away and that are not encouraged to interact with the focal dog.                                                                                                                      |
| Eating food                         | When eating food (e.g. from a food bowl, or toy filled with food) and people approach within close proximity or attempt to touch the food container.                                                                                                  |
| Interactions with toys              | When interacting with toys and people approach within close proximity or attempt to touch the toy.                                                                                                                                                    |
| Interactions with female dogs       | During structured interaction with a female dog, including approaching each other, walking in parallel, and interacting off-lead. Both dogs are aware of each other’s presence and are in close enough proximity to engage in a physical interaction. |
| Interactions with male dogs         | During structured interaction with a male dog, including approaching each other, walking in parallel, and interacting off-lead. Both dogs are aware of each other’s presence and are in close enough proximity to engage in a physical interaction.   |

217 We aggregated behavioural observations across time for each dog into a dichotomous  
 218 variable indicating whether a dog had or had not shown aggression in a particular context

219 at any time while at the shelter (Table S1). This was performed because the overall  
220 prevalence of aggression was low, with only 1.06% of all observations across days  
221 involving aggression towards people and 1.13% towards dogs. Thus, the main difference  
222 between individuals was whether they had or had not shown aggression in a particular  
223 context during their time at the shelter. We interpret aggressiveness here as a between-  
224 individual difference variable.

225

## 226 **Validity of behaviour recordings**

227 Validity of the recording of behaviour was assessed separately from the main data  
228 collection as part of a wider project investigating the use of the observational assessment  
229 method. Ninety-three shelter employees trained in conducting behavioural observations  
230 each watched (in groups of 5 – 10 people) 14 videos, approximately 30 seconds each,  
231 presenting exemplars of 2 different behaviours from seven contexts (to keep the sessions  
232 concise and maximise the number of participants). For each context, behaviours were  
233 chosen pseudo-randomly by numbering each behaviour and selecting two numbers using  
234 a random number generator. Experienced behaviourists working at the shelter filmed the  
235 videos demonstrating the behaviours. Videos were shown to participants once in a  
236 pseudo-random order. After each video, participants recorded on a paper answer sheet the  
237 behaviour they thought most accurately described the dog's behaviour based on the  
238 ethogram specific to the context depicted. Two of the videos illustrated aggression: one in  
239 a combined *Interactions with new and familiar people* context (combined because  
240 familiarity between specific people and dogs was not universally known) and one in the  
241 *In kennel towards dogs* context. The first video had an ethogram of 13 possible

242 behaviours to choose from, and the second had 11 behaviours. The authors were blind to  
243 the selection of videos shown and to the video coding sessions with shelter employees.

244

## 245 **Data analysis**

246 All data analysis was conducted in R version 3.3.2 [60].

247

## 248 **Validity of behaviour recordings**

249 The degree to which shelter employees could recognise and correctly record aggressive  
250 behaviour from the videos (chosen by experienced behaviourists at the shelter) was  
251 determined by the percentage of participants who correctly identified the 2 videos as  
252 showing examples of aggression.

253

## 254 **Missing data**

255 Data were missing when dogs did not experience particular contexts while at the shelter.  
256 The missing data rate was between 0.06% and 5% for each context, except for the  
257 *Interactions with female dogs* and *Interactions with male dogs* categories which had 17%  
258 and 18% of missing values, respectively (because structured interactions with other dogs  
259 did not arise as frequently). Moreover, 16% and 8% of dogs were missing weight  
260 measurement and neuter status data, respectively, which were independent variables  
261 statistically controlled for in subsequent analyses. We created 5 multiply imputed data

262 sets (using the *Amelia* package; [61]), upon which all following analyses in the sections  
263 below were conducted and results pooled. The multiple imputation took into account the  
264 hierarchical structure of the data (observations within dogs), all independent variables  
265 reported below, and the data types (ordered binary variables for the context data,  
266 positive-continuous for weight measurements, nominal for neuter status; see the R script).  
267 The data were assumed to be missing at random, that is, dependent only on other  
268 variables in the analyses.

269

## 270 **Structural equation models**

271 We used structural equation modelling to assess whether aggression towards people  
272 (contexts: *Handling, In kennel towards people, Out of kennel towards people,*  
273 *Interactions with familiar people, Interactions with unfamiliar people, Eating food,*  
274 *Interactions with toys*) and towards dogs (contexts: *In kennel towards dogs, Out of kennel*  
275 *towards dogs, Interactions with female dogs, Interactions with male dogs*) could be  
276 explained by two latent aggressiveness traits: aggressiveness towards people and dogs,  
277 respectively. Since positive correlations between different aggressiveness traits have been  
278 reported in dogs [55], we compared a model where the latent variables were orthogonal  
279 to a model where variables were allowed to covary. Models were fit using the *lavaan*  
280 package [62], with the weighted least squares mean and variance adjusted (WLSMV)  
281 estimator and theta/conditional parameterisation, as recommended for categorical  
282 dependent variables [8,63,64]. The latent variables were standardised to have mean 0 and  
283 variance 1. The results were combined across imputed data sets using the ‘runMI’



284 function in the *semTools* package [65]. The fit of each model was ascertained using the  
285 comparative fit index (CFI) and Tucker Lewis index (TLI), where values > 0.95 indicate  
286 excellent fit, as well as the root mean squared error of approximation (RMSEA) where  
287 values < 0.06 indicate good fit [7]. Parameter estimates were summarised by test statistics  
288 and 95% confidence intervals (CI).

289

## 290 **Local independence**

291 We tested the assumption of local independence by re-fitting the best-fitting structural  
292 equation model with residual covariances specified between context variables. To  
293 maintain a theoretically driven approach (see [66] regarding the best practice of including  
294 residual covariances in structural equation models) and model identifiability, we only  
295 tested a predefined set of covariances based on which contexts shared close temporal-  
296 spatial relationships. First, we allowed covariances between *Handling* with *In kennel*  
297 *towards people*, *Interactions with familiar people*, *Interactions with unfamiliar people*  
298 and *Interactions with toys*, respectively, since the *Handling* context could directly  
299 succeed these other contexts. The residual covariance between *Handling* and *Eating food*  
300 was not estimated because shelter employees would be unlikely to handle a dog while the  
301 dog ate its daily meals. The residual covariance between *Handling* and *Out of kennel*  
302 *towards people* was not estimated because any association between *Handling* and *Out of*  
303 *kennel towards people* would be mediated by either the *Interactions with familiar people*  
304 or *Interactions with unfamiliar people* context. Therefore, secondly, we estimated the  
305 three-way covariances between *Out of kennel towards people*, *Interactions with familiar*

306 *people* and *Interactions with unfamiliar people*. Similarly, and lastly, we estimated the  
307 three-way covariances between *Out of kennel towards dogs*, *Interactions with female*  
308 *dogs* and *Interactions with male dogs*. No covariances were inspected between *In kennel*  
309 *towards dogs* and other aggressiveness towards dogs contexts since large time gaps were  
310 more likely to separate observations between those contexts.

311

### 312 **Measurement invariance**

313 To test for measurement invariance in each of the latent traits derived from the best  
314 fitting structural equation model, we investigated the response patterns across aggression  
315 contexts related to the same latent aggressiveness trait using Bayesian hierarchical  
316 logistic regression models. These models were analogous to the 1-parameter item  
317 response theory model, which represents the probability that an individual responds  
318 correctly to a particular test item as a logistic function of i) each individual's latent ability  
319 and ii) the item's difficulty level. This model can be expressed as a hierarchical logistic  
320 regression model [67,68], whereby individual latent abilities are modelled as individual-  
321 specific intercepts (i.e. 'random intercepts'), the propensity for a correct answer to an  
322 item  $i$  is its regression coefficient  $\beta_i$ , and credible interactions between items and relevant  
323 independent variables (e.g. group status) indicate a violation of measurement invariance.  
324 Here, the dependent variable was the binary score for whether or not dogs had shown  
325 aggression in each context and the average probability of aggression across contexts  
326 varied by dog, representing latent levels of aggressiveness. Context type, dog age, dog  
327 sex and their interactions were included as categorical independent variables. Age was

328 treated as a categorical variable, with categories reflecting general developmental  
329 periods: i) 4 months to 10 months (juvenile dogs before puberty), ii) 10 months to 3 years  
330 (dogs maturing from juveniles to adults), iii) 3 years to 6 years (adults), and iv) 6 years +  
331 (older dogs). Broad age categories were chosen due to potentially large differences in  
332 developmental timing between individuals. Age was categorised because we predicted  
333 that aggression would be dependent on these developmental periods.

334

335 Models included additional demographic variables (Table 1) that may mediate the  
336 probability of aggression: body weight (average weight if multiple measurements were  
337 taken), total number of days spent at the shelter, the rehoming centre at which dogs were  
338 based (London, Old Windsor, Brands Hatch), neuter status (neutered before arrival,  
339 neutered at the shelter, not neutered) and source type (relinquished by owner, returned to  
340 the shelter after adoption, stray). Categorical variables were represented as sum-to-zero  
341 deflections from the group-level intercept to ensure that the intercept represented the  
342 average probability of aggression across the levels of each categorical predictor. Weight  
343 and total days at the shelter were mean-centered and standardised by 2 standard  
344 deviations. Due to the potentially complex relationships between these variables and  
345 aggression (e.g. interactive effects between neuter status and sex; [52]), which could also  
346 include violations of measurement invariance, we decided not to interpret their effects  
347 inferentially. Instead, they were included to make the assessment of measurement  
348 invariance between sexes and age groups conditional on variance explained by  
349 potentially important factors.

350

351 For comparability to other studies in animal personality, behavioural repeatability was  
352 calculated across contexts in each model using the intraclass correlation coefficient  
353 (ICC), calculated as  $\frac{\sigma_{\beta}^2}{\sigma_{\beta}^2 + \sigma_{\epsilon}^2}$ , where  $\sigma_{\beta}^2$  represented the between-individual variance of the  
354 probability of aggression (i.e. the variance of the random intercepts), and  $\sigma_{\epsilon}^2$  was  $\pi^2/3$ ,  
355 the residual variance of the standard logistic distribution [69].

356

### 357 *Computation*

358 Models were computed using the probabilistic programming language Stan version  
359 2.15.1 [70], using Hamiltonian Monte Carlo, a type of Markov Chain Monte Carlo  
360 (MCMC) algorithm, to sample from the posterior distribution. Prior distributions for all  
361 independent variables were normal distributions with mean 0 and standard deviation 1,  
362 attenuating regression coefficients towards zero for conservative inference. The prior on  
363 the overall intercept parameter was normally distributed with mean 0 and standard  
364 deviation 5. The standard deviation of dog-specific intercept parameters was given a half-  
365 Cauchy prior distribution with mean 0 and shape 2. Each model was run with 4 chains of  
366 2,000 iterations with a 1,000 step warm-up period. The Gelman-Rubin statistic (ideally <  
367 1.05) and visual assessment of traceplots were used to assess MCMC convergence. We  
368 checked the accuracy of the model predictions against the raw data using graphical  
369 posterior predictive checks. For plotting purposes, predicted probabilities of aggression  
370 were obtained by marginalising over the random effects (explained in the Supporting

371 Information). Regression coefficients were expressed as odds ratios and were  
372 summarised by their mean and 95% Bayesian highest density interval (HDI), representing  
373 the 95% most probable parameter values. To compare levels of categorical variables and  
374 their interactions, we computed the 95% HDI of the differences between the respective  
375 posterior distributions.

376

### 377 *Model selection & parameter inference*

378 Models were run on each imputed data set and their respective posterior distributions  
379 were averaged to attain a single posterior distribution for inference. Adopting a Bayesian  
380 approach allowed the estimation of interaction parameters (i.e. testing measurement  
381 invariance) without requiring corrections for multiple comparisons as in null hypothesis  
382 significance testing [71]. Nonetheless, models included a large number of estimated  
383 parameters. Two strategies were employed to guard against over-fitting of models to data.  
384 First, we selected the model with the best out-of-sample predictive accuracy given the  
385 number of parameters based on the Widely Applicable Information Criterion (WAIC;  
386 using the R package *loo* [72]). Four variants of each model were computed: two-way  
387 interactions between contexts and age and contexts and sex, respectively (model 1), a  
388 single interaction with sex but not with age (model 2), a single interaction with age but  
389 not with sex (model 3), and no interactions (model 4). All models included the mediating  
390 independent variables above. Second, to avoid testing point-estimate null hypotheses, the  
391 effect of a parameter was only considered credibly different from zero if the odds ratio  
392 exceeded the region of practical equivalence (ROPE; see [73]) around an odds ratio of 1

393 from 0.80 to 1.25. An odds ratio of 0.80 or 1.25 indicates a 20% decrease or increase (i.e.  
394 4/5 or 5/4 odds), respectively, in the odds of an outcome, frequently used in areas of  
395 bioequivalence testing (e.g. [74]), which we here considered to be small enough to  
396 demonstrate a negligible effect in the absence of additional information. If a 95% HDI  
397 fell completely within the ROPE, the null hypothesis of no credible influence of that  
398 parameter was accepted; if a 95% HDI included part of the ROPE, then the parameter's  
399 influence was left undecided [73].

400

## 401 **Ethics statement**

402 Permission to use and publish the data was received from the shelter. Approval from an  
403 ethical review board was not required for this study.

404

## 405 **Data accessibility**

406 Supporting Information (data, R script, Stan model code, Tables S1-4) can be found at:  
407 [https://github.com/ConorGoold/GooldNewberry\\_aggression\\_shelter\\_dogs](https://github.com/ConorGoold/GooldNewberry_aggression_shelter_dogs).

408

409

410

## 411 **Results**

### 412 **Validity of behaviour recordings**

413 For the video showing aggression towards people, 52% of participants identified the  
414 behaviour correctly as aggression and 42% identified the behaviour as non-aggressive but  
415 (similarly) reactive behaviour (see definitions above). For the video showing aggression  
416 towards dogs, 53% identified the behaviour correctly and 44% identified the behaviour as  
417 non-aggressive but reactive behaviour. For the 12 other videos not showing aggression,  
418 only 1 person incorrectly coded a video as aggression towards people and 3 people  
419 incorrectly coded videos as aggression towards dogs.

420

### 421 **Structural equation models**

422 The raw tetrachoric correlations between the aggression contexts were all positive,  
423 particularly between contexts recording aggression towards people and dogs,  
424 respectively, supporting their convergent validity (Table S2). The model with correlated  
425 latent variables fit marginally better (CFI: 0.96; TLI: 0.95; RMSEA: 0.03) than the model  
426 with uncorrelated variables (CFI: 0.94; TLI: 0.92; RMSEA: 0.04). All regression  
427 coefficients of the model with correlated latent variables were positive and significant  
428 (i.e. the 95% CI did not include zero), and the latent variables shared a significant  
429 positive covariance (Table 3).

430

**Table 3. Parameter estimates from the best-fitting structural equation model.**

| Parameter                                        | Estimate | SE   | <i>t</i> value | 95% CI       |
|--------------------------------------------------|----------|------|----------------|--------------|
| Handling <sup>a</sup>                            | 0.81     | 0.06 | 14.25          | [0.70, 0.92] |
| In kennel towards people <sup>a</sup>            | 1.29     | 0.09 | 14.17          | [1.12, 1.46] |
| Out of kennel towards people <sup>a</sup>        | 0.83     | 0.07 | 11.99          | [0.69, 0.96] |
| Interactions with familiar people <sup>a</sup>   | 0.96     | 0.07 | 14.23          | [0.83, 1.09] |
| Interactions with unfamiliar people <sup>a</sup> | 1.54     | 0.12 | 12.46          | [1.23, 1.78] |
| Eating food <sup>a</sup>                         | 0.70     | 0.06 | 12.33          | [0.59, 0.81] |
| Interactions with toys <sup>a</sup>              | 0.51     | 0.06 | 8.32           | [0.39, 0.63] |
| In kennel towards dogs <sup>b</sup>              | 0.70     | 0.06 | 11.94          | [0.59, 0.82] |
| Out of kennel towards dogs <sup>b</sup>          | 0.47     | 0.04 | 10.80          | [0.38, 0.55] |
| Interactions with female dogs <sup>b</sup>       | 0.87     | 0.07 | 12.05          | [0.72, 1.02] |
| Interactions with male dogs <sup>b</sup>         | 0.88     | 0.07 | 12.23          | [0.74, 1.03] |
| Covariance: People ~ Dogs                        | 0.26     | 0.03 | 7.94           | [0.19, 0.33] |

<sup>a</sup> Contexts reflecting aggressiveness towards people

<sup>b</sup> Contexts reflecting aggressiveness towards dogs

431

## 432 **Local independence**

433 Allowing the pre-defined residuals to co-vary in the best-fitting structural equation model

434 resulted in a better fit (CFI = 0.98; TLI = 0.97; RMSEA: 0.03). Significant negative

435 covariances were observed between the *Handling* and *In kennel towards people* contexts



436 (Table 4) and the *Handling* and *Interactions with unfamiliar people* contexts. A  
437 significant positive covariance was observed between *Out of kennel towards people* and  
438 *Interactions with unfamiliar people* contexts. No significant residual covariances between  
439 contexts reflecting aggressiveness towards dogs were observed.

440

**Table 4. Estimated residual covariances between contexts.**

| <b>Residual covariances</b>                                                          | <b>Estimate</b> | <b>SE</b> | <b><i>t</i> value</b> | <b>95% CI</b>  |
|--------------------------------------------------------------------------------------|-----------------|-----------|-----------------------|----------------|
| Handling ~ In kennel towards people <sup>a</sup>                                     | -0.60           | 0.21      | -2.86                 | [-1.01, -0.19] |
| Handling ~ Interactions with familiar people <sup>a</sup>                            | 0.16            | 0.09      | 1.84                  | [-0.01, 0.33]  |
| Handling ~ Interactions with unfamiliar people <sup>a</sup>                          | -0.48           | 0.19      | -2.49                 | [-0.86, -0.10] |
| Handling ~ Interactions with toys <sup>a</sup>                                       | 0.14            | 0.07      | 1.85                  | [-0.01, 0.28]  |
| Out of kennel towards people ~ Interactions with familiar people <sup>a</sup>        | 0.04            | 0.08      | 0.49                  | [-0.12, 0.20]  |
| Out of kennel towards people ~ Interactions with unfamiliar people <sup>a</sup>      | 0.24            | 0.09      | 2.56                  | [0.06, 0.42]   |
| Interactions with familiar people ~ Interactions with unfamiliar people <sup>a</sup> | -0.02           | 0.12      | -0.16                 | [-0.25, 0.21]  |
| Out of kennel towards dogs ~ Interactions with female dogs <sup>b</sup>              | -0.55           | 0.48      | -1.15                 | [-1.50, 0.40]  |
| Out of kennel towards dogs ~ Interactions with male dogs <sup>b</sup>                | -0.45           | 0.40      | -1.13                 | [-1.22, 0.33]  |
| Interactions with female dogs ~ Interactions with male dogs <sup>b</sup>             | -0.24           | 0.50      | -0.49                 | [-1.23, 0.74]  |

<sup>a</sup> Contexts reflecting aggressiveness towards people

<sup>b</sup> Contexts reflecting aggressiveness towards dogs

## 442 **Measurement invariance**

443 Separate models were run for contexts reflecting aggressiveness towards people and  
444 aggressiveness towards dogs. All models converged. Posterior predictive checks of model  
445 estimates reflected the raw data (Figs 1 and 2). The full measurement invariance model  
446 (model 1) including interactions between contexts and sex and contexts and age groups  
447 had the best out-of-sample predictive accuracy for both the aggressiveness towards  
448 people and aggressiveness towards dogs models, respectively, illustrated by the lowest  
449 WAIC values (Table 5). Since some models included numerous interactions, we provide  
450 an overall summary of the main results below (Figs 1 and 2) with full parameter  
451 estimates provided in Tables S3 and S4.

452

**Table 5. Mean  $\pm$  standard error of the Widely Applicable Information Criteria (WAIC) values (lower is better) per model and aggressiveness variable.**

| <b>Model</b> | <b>Aggressiveness towards people</b> | <b>Aggressiveness towards dogs</b> |
|--------------|--------------------------------------|------------------------------------|
| Model 1      | 13405.6 $\pm$ 179.0                  | 15257.2 $\pm$ 133.1                |
| Model 2      | 13506.3 $\pm$ 179.6                  | 15381.4 $\pm$ 133.4                |
| Model 3      | 13426.3 $\pm$ 179.1                  | 15285.3 $\pm$ 133.0                |
| Model 4      | 13521.7 $\pm$ 179.5                  | 15407.6 $\pm$ 133.4                |

453

454

## 455 **Aggressiveness towards people**

456 The odds of aggression towards people, across categorical predictors and for an average  
457 dog of mean weight and length of stay at the shelter, were 0.022 (HDI: 0.021 to 0.024), a  
458 probability of approximately 2%. On average, aggression was most likely in the *In kennel*  
459 *towards people* context (OR = 0.054; HDI: 0.049 to 0.058) and least probable in the  
460 *Interactions with toys* context (OR = 0.008; HDI: 0.007 to 0.009).

461

462 Aggression was less likely across contexts for females than males (OR = 0.719; HDI:  
463 0.668 to 0.770), although there were also credible interactions between sex and contexts  
464 (Fig 1A; Table S3). Whereas males and females had similar odds of aggression in the *Out*  
465 *of kennel towards people* context, smaller differences were observed between *Out of*  
466 *kennel towards people* and *Handling* (OR = 0.578; HDI: 0.481 to 0.682), *Eating food*  
467 (OR = 1.812; HDI: 1.495 to 2.152) and *Interactions with familiar people* (OR = 1.798;  
468 HDI: 1.488 to 2.126) contexts in females compared to males. Additionally, whereas  
469 aggression in the *Interactions with unfamiliar people* context was similar between males  
470 and females, larger differences were observed between *Interactions with unfamiliar*  
471 *people* and *Handling* (OR = 0.616; HDI: 0.530 to 0.702), *Eating food* (OR = 0.594; HDI:  
472 0.506 to 0.686) and *Interactions with familiar people* (OR = 0.598; HDI: 0.513 to 0.687)  
473 contexts in females compared to males.

474

475 Apart from lower odds of aggression in 4 to 10 month olds compared to 10 month to 3  
476 year old dogs (OR = 0.638; HDI: 0.565 to 0.705), there was no simple influence of age  
477 group on aggressiveness. Between the 4 to 10 months old and 3 to 6 years old groups,  
478 differences between the odds of aggression across contexts varied due to an increase of  
479 aggression in certain contexts but not others (Fig 1B; Table S4). Aggression in *In kennel*  
480 *towards people* and *Interactions with unfamiliar people* contexts particularly increased,  
481 leading to larger differences between, for example, *In kennel towards people* and *Eating*  
482 *food* (OR = 0.524; HDI: 0.400 to 0.642) and *Eating food* and *Interactions with unfamiliar*  
483 *people* (OR = 1.721; HDI: 1.403 to 2.059) contexts for 10 month to 3 year olds compared  
484 to 4 to 10 month olds, and between *In kennel towards people* and *Out of kennel towards*  
485 *people* (OR = 0.470; HDI: 0.355 to 0.606) and *Out of kennel towards people* and  
486 *Interactions with unfamiliar people* (OR = 2.051; HDI: 1.608 to 2.543) contexts in 3 to 6  
487 year olds compared to 4 to 10 month olds. In 3 to 6 year old compared to 10 month to 3  
488 year old dogs, aggression increased in the *Handling* and *Eating food* contexts but  
489 decreased in the *Out of kennel towards people* context, resulting in larger differences  
490 between, for instance, *Handling* and *Out of kennel towards people* (OR = 0.526; HDI:  
491 0.409 to 0.631) and *Out of kennel towards people* and *Interactions with unfamiliar people*  
492 (OR = 2.349; HDI: 1.891 to 2.925), and smaller differences between *Eating food* and  
493 *Interactions with familiar people* (OR = 0.576; HDI: 0.468 to 0.687).

494

495 Dogs over 6 years old demonstrated qualitatively different response patterns across  
496 certain contexts than all other age groups. While aggression was most probable in *In*  
497 *kennel towards people* and *Interactions with unfamiliar people* contexts for dogs aged 4

498 months through 6 years, dogs over 6 years old were most likely to show aggression in the  
499 *Handling* context, leading to interactions between, for example, *Handling* and *In kennel*  
500 *towards people*, and between *Handling* and *Interactions with unfamiliar people* contexts  
501 compared to the other age groups (Fig 1B; Table S3). Aggression when *Eating food* and  
502 in *Interactions with toys* contexts also increased compared to that expressed by younger  
503 dogs, resulting in credible differences between, for instance, *Eating food* and *Interactions*  
504 *with familiar people* contexts between dogs aged 10 months to 3 years and over 6 years  
505 (OR = 0.379; HDI: 0.300 to 0.465) and between *Out of kennel towards people* and  
506 *Interactions with toys* contexts between over 6 year olds and all other age groups (Table  
507 S3).

508

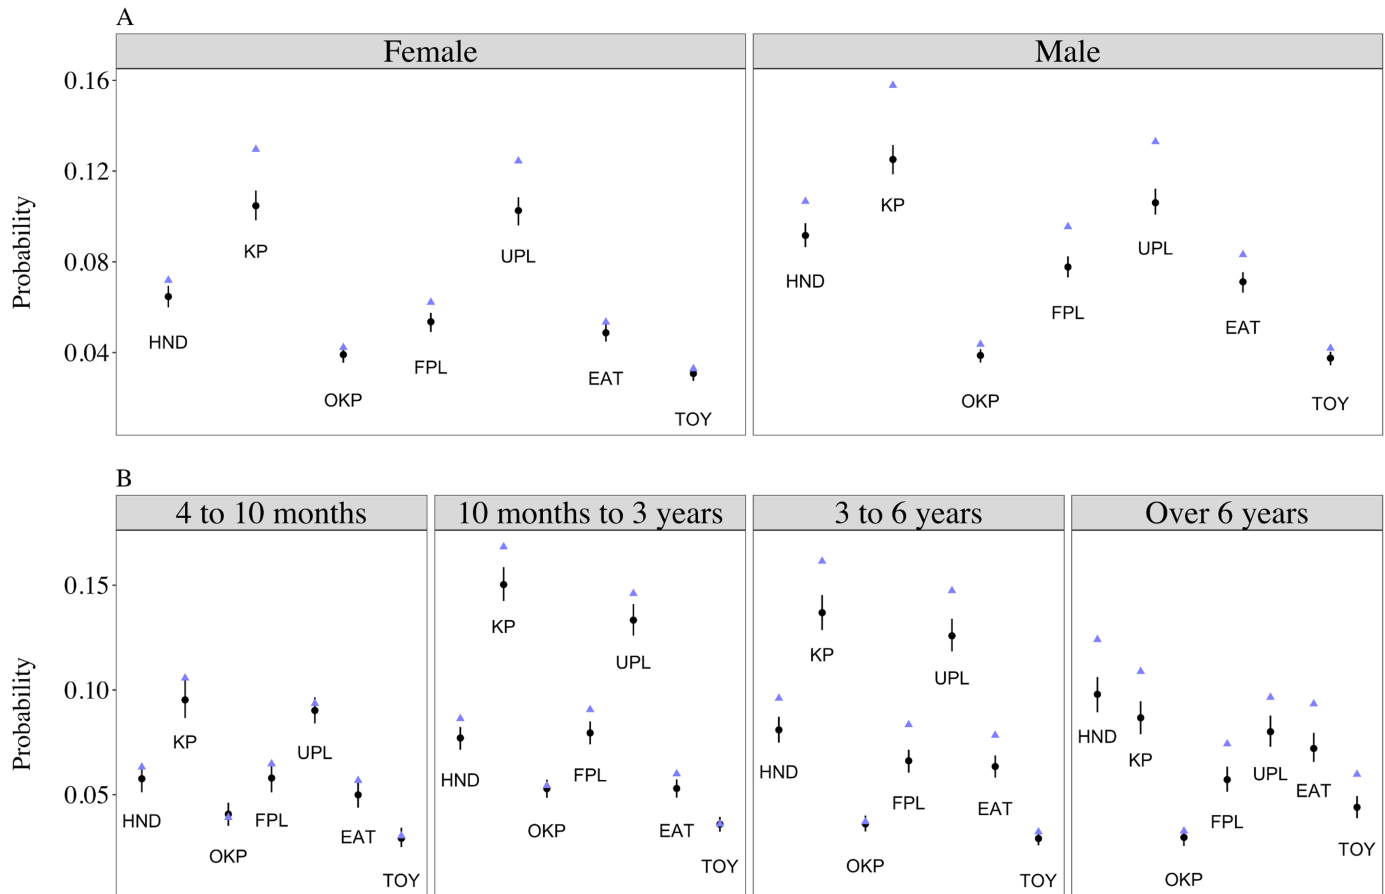

509 **Fig 1. Predicted probabilities of aggression towards people in different contexts by**  
510 **sex (panel A) and age groups (panel B).** Black points and vertical lines show mean and  
511 95% highest density intervals of model parameter estimates; blue triangles show raw  
512 sample data. Model estimates were obtained by marginalising over the random effects  
513 (see the Supporting Information). Abbreviations used in the figure: HND (*Handling*); KP  
514 (*In kennel towards people*); OKP (*Out of kennel towards people*); FPL (*Interactions with*  
515 *familiar people*); UPL (*Interactions with unfamiliar people*); EAT (*Eating food*); TOY  
516 (*Interactions with toys*).

517

518

## 519 **Aggressiveness towards dogs**

520 The odds of aggression towards dogs, across categorical predictors and for an average  
521 dog of mean weight and length of stay at the shelter, was 0.176 (HDI: 0.168 to 0.184),  
522 corresponding to a probability of approximately 15%. Dogs were most likely to show  
523 aggression in the *Interactions with male dogs* context (OR = 0.297; HDI: 0.198 to 0.217)  
524 and least likely in the *In kennel towards dogs* context (OR = 0.099; HDI: 0.094 to 0.104;  
525 Fig 2; Table S4).

526

527 No credible mean-level differences existed between females and males (OR = 1.187;  
528 HDI: 1.128 to 1.250). However, the difference in aggression between the *Interactions*  
529 *with female dogs* and *Interactions with male dogs* contexts was smaller for females (OR  
530 = 1.542; HDI: 1.400 to 1.704; Fig 2A; Table S4), as were the differences between  
531 *Interactions with male dogs* and *In kennel towards dogs* (OR = 0.661; HDI: 0.590 to  
532 0.732) and *In kennel towards dogs* and *Out of kennel towards dogs* (OR = 1.420; HDI:  
533 1.269 to 1.587). Females were also more likely to show aggression in *Interactions with*  
534 *female dogs* than *Out of kennel towards dogs* compared to males (OR = 1.444; HDI:  
535 1.301 to 1.603).

536

537 Dogs aged 4 to 10 months old had credibly lower odds of aggression towards dogs than  
538 older dogs across contexts (Fig 2B; Table S4). However, contexts and age also showed  
539 interactive effects. In particular, aggression in *Interactions with female dogs* and  
540 *Interactions with male dogs* contexts tended to increase relative to other contexts. For



541 instance, the relationship between *Interactions with female dogs* and *Out of kennel*  
542 *towards dogs* contexts reversed in direction between 4 to 10 month and 10 month to 3  
543 year olds (OR = 0.595; HDI: 0.495 to 0.688) as did the relationship between *Interactions*  
544 *with male dogs* and *Out of kennel towards dogs* contexts (OR = 0.499; HDI: 0.422 to  
545 0.575). The relationship between *In kennel towards dogs* and *Out of kennel towards dogs*  
546 contexts also changed across age groups (Fig 2B; Table S4). Four to 10 months old were  
547 more likely to show aggression in *Out of kennel towards dogs* than *In kennel towards*  
548 *dogs* contexts, but the difference was smaller in 10 months to 3 year olds (OR = 0.608;  
549 HDI: 0.505 to 0.728) and in over 6 year olds (OR = 0.396; HDI: 0.316 to 0.481). The  
550 latter relationship was reversed in 3 to 6 year olds compared to 4 to 10 month old dogs  
551 (OR = 0.277; HDI: 0.227 to 0.331) and 10 month to 3 year old dogs (OR = 0.456; HDI:  
552 0.396 to 0.516).

553

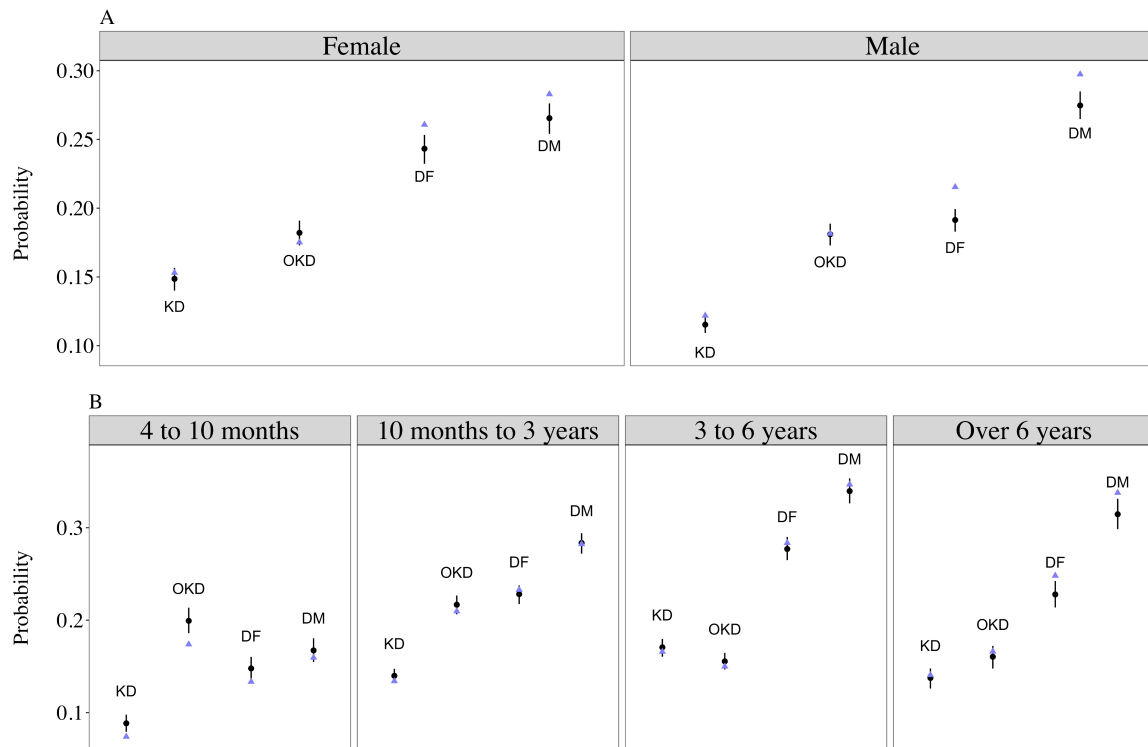

554

555 **Fig 2. Predicted probabilities of aggression towards dogs in different contexts by sex**

556 **(panel A) and age groups (panel B).** Black points and vertical lines show mean and

557 95% highest density intervals of model parameter estimates; blue triangles show raw

558 sample data. Model estimates were obtained by marginalising over the random effects

559 (see the Supporting Information). Abbreviations used in the figure: KD (*In kennel*

560 *towards dogs*); OKD (*Out of kennel towards dogs*); DF (*Interactions with female dogs*);

561 DM (*Interactions with male dogs*).

562

## 563 **Repeatability**

564 Both aggressiveness towards people and dogs showed moderate repeatability across

565 contexts ( $ICC_{people} = 0.479$ ; HDI: 0.466 to 0.491;  $ICC_{dogs} = 0.303$ ; HDI: 0.291 to

566 0.315), although aggressiveness towards people was more repeatable than aggressiveness

567 towards dogs ( $ICC_{difference} = 0.176$ ; HDI: 0.158 to 0.192).

568

## 569 **Discussion**

570 In this study, we have examined local independence and measurement invariance of  
571 aggressiveness traits in shelter dogs. Observational recordings of aggression directed  
572 towards people and dogs across different shelter contexts were explained by two  
573 positively correlated latent variables, and behaviour across contexts was moderately  
574 repeatable. These results are consistent with the concept of animal personality, which is  
575 used to describe behaviour that shows moderately consistent between-individual  
576 differences across time or contexts, and is characterised by multiple observed behaviours  
577 being decomposed into lower-dimensional behavioural traits [4]. However, we found  
578 violations of local independence between contexts with close temporal-spatial  
579 relationships and measurement invariance with respect to sex and age groups,  
580 highlighting potential measurement biases.

581

582 Local independence implies that the association between manifest variables is greater  
583 than that explained by the latent variable. For aggressiveness towards people, aggression  
584 in the *Handling* context was negatively related with the *In kennel towards people* and  
585 *Interactions with unfamiliar people* contexts, while positive covariances were present  
586 between *Out of kennel towards people* and *Interactions with unfamiliar people* contexts.  
587 Violations of local independence may arise through shared method variance [75–78] or  
588 unmodelled latent variables influencing manifest variables [79,80]. If a dog showed  
589 aggression when an unfamiliar person approached, it may be less likely to be handled by  
590 that person, which may explain the negative residual covariations between the *Handling*

591 and *In kennel towards people* and *Interactions with unfamiliar people* contexts,  
592 respectively. These contexts were, in fact, positively correlated when latent levels of  
593 aggressiveness were not accounted for (Table S4). In addition, the positive residual  
594 correlation between *Out of kennel towards people* and *Interactions with unfamiliar*  
595 *people* may be mediated by additional traits of interest to personality researchers, such as  
596 fearfulness or anxiety [29,81], if dogs who are fearful of interacting with unfamiliar  
597 people are more likely to show aggression beyond that described by a latent  
598 aggressiveness trait.

599

600 While authors have argued that greater standardisation and validation of personality  
601 assessments is key to ensuring the accurate measurement of underlying traits [36,48,49],  
602 it may be untenable to avoid dependencies between testing contexts. Displays of  
603 aggression in one sub-test will likely change how people conduct future sub-tests with the  
604 same dog, regardless of test standardisation. Human psychologists have argued that  
605 violations of local independence are a natural consequence of the organisation of  
606 behaviour as a complex dynamic system [82,83], which unfolds with respect to time- and  
607 context-dependent constraints [84]. Thus, awareness of local independence and its  
608 violation could facilitate closer understanding of the dynamics driving personality test  
609 responses beyond explanations purely based on personality traits.

610

611 While different subsets of a population may differ in mean levels of trait expression,  
612 interactions between behavioural responses and those subsets indicate that the same

613 phenomenon is not under measurement across groups [23,24]. We found that the  
614 probability of aggression across contexts was dependent on sex and age conditional on  
615 latent levels of aggressiveness (Figs 1 and 2; Tables S3 and S4). Female dogs, for  
616 example, were more likely than males to show aggression in *Out of kennel towards*  
617 *people* and *Interactions with unfamiliar people* contexts relative to other contexts (Fig  
618 1A). Females also demonstrated similar odds of aggression during *Interactions with*  
619 *female dogs* and *Interactions with male dogs*, whereas males were more likely to show  
620 aggression towards male than female dogs (Fig 2a). As with local independence, different  
621 behavioural variables unaccounted for in this study may result in violations of  
622 measurement invariance. While dogs up to 6 years old were most likely to show  
623 aggression in *In kennel towards people* and *Interactions with unfamiliar people contexts*,  
624 dogs over 6 years old demonstrated aggression most commonly in the *Handling* context.  
625 Dogs over 6 years old also showed an increase in aggression in the *Eating food* and  
626 *Interactions with toys* contexts relative to other age groups. These results suggest that  
627 older dogs in shelter populations may be less tolerant during close interactions with  
628 people (i.e. handling, people in the vicinity of their food and toys) compared to other  
629 contexts, which may driven by other quantifiable factors such as pain or sensitivity (e.g.  
630 [29]).

631

632 Although we have identified violations of both local independence and measurement  
633 invariance, we remain cautious about hypothesising *a posteriori* about their causes.  
634 Personality traits in animal behaviour are typically defined operationally, based on the  
635 statistical repeatability of quantifiable behaviour [77,85,86]. As discussed in human

636 personality psychology, operational definitions can be ontologically ambiguous [87,88].  
637 That is, while operational definitions facilitate experimentation in animal personality [4],  
638 they do not necessarily designate biological mechanisms underlying trait expression. For  
639 example, Budaev and Brown remark that boldness, defined as a propensity to take risks,  
640 could encompass a range of distinct personality traits, each with a different biological  
641 basis [75]. Whilst reflective latent variable models allow researchers to test hypotheses  
642 about the relatedness of measured behaviours via one or more underlying traits, they have  
643 also been criticised as ambiguous [82]. For example, it is uncertain what reflective latent  
644 variables may represent in biological organisation [87] or even whether they are features  
645 individuals possess or simply emergent features of between-individual differences  
646 [89,90]. Such considerations highlight the importance of research on the proximate  
647 mechanisms of personality [85] and longitudinal data analyses to separate between- from  
648 within-individual behavioural variation [91,92].

649

650 A number of authors have emphasised the poor predictive value of aggression tests in  
651 shelter dogs [39–41,50] and that low occurrence of aggression specifically can make its  
652 accurate measurement difficult [40]. The probability of observing aggression on any  
653 particular day was low in this study (approximately 1%), and the number of dogs who, on  
654 average, showed aggression to people at least once while at the shelter was much lower  
655 than the number that showed aggression towards dogs, on average (Figs 1 and 2).  
656 Nonetheless, our evaluations of validity indicated that between 40 and 45% of the shelter  
657 employees mistook observations of aggression for non-aggressive responses (e.g. over-  
658 excitement and frustration when seeing people/dogs), meaning that the true probability of

659 aggression was potentially under-estimated (although incorrectly coding other behaviours  
660 as aggression also occurred, albeit rarely). Moreover, our assessments of validity were  
661 based on shelter staff evaluations of brief video recordings that may be less reliable than  
662 the live, spontaneous behavioural recordings upon which our main analyses were based,  
663 resulting in a lower percentage of correctly identified instances of aggression. For the two  
664 videos being evaluated, the shelter employees had 13 and 11 different behavioural codes,  
665 respectively, to choose from to describe the behaviours observed. Thus, while employees  
666 as a whole were undecided about whether the motivation for the behaviour was  
667 aggressive or non-aggressive, the vast majority of employees described the behaviour as  
668 reactive, despite potentially erring on the side of caution by labelling aggressive  
669 behaviours as non-aggressive. Comparable estimates of validity are not present in the  
670 literature on dog personality, but are particularly important in shelter settings where  
671 accurate recording of aggression is paramount. It is also worth noting that how to assess  
672 validity has received much debate (e.g. [87,92]). In this study, we used expert judgement  
673 as a benchmark to which shelter employees' responses were compared, but validity is  
674 frequently assessed in dog personality by inspecting patterns of correlation coefficients  
675 between similar and dissimilar behaviours (e.g. convergent or divergent validity; [29]).  
676 This is less directly interpretable than reporting the percentage of answers that were  
677 correct, as used here. Moreover, the predictive validity of personality assessments in dogs  
678 have been inconsistent (e.g. [40-42]). More discussion of the concept of validity, and how  
679 best to assess it, is warranted in studies of dog personality.

680



681 Infrequent occurrence and/or recording of aggression may also limit accurate predictions  
682 of future behaviour. Patronek and Bradley [50] demonstrate using simulation that the low  
683 prevalence of aggression inflates the chance that aggression shown in a shelter  
684 assessment represents a false positive. In general, our results support this conclusion in  
685 the sense that aggression may be shown differentially across contexts not explained by  
686 latent levels of aggressiveness. Violations of local independence and measurement  
687 invariance as found here indicate, further, that it is not only the difference between false  
688 and true positives and negatives, but the validity of inferring homogeneous personality  
689 traits by which to compare individual dogs, that needs careful consideration.  
690 Consequently, we agree with recommendations to establish the efficacy of longitudinal,  
691 observational assessments rather than relying on a single assessment made using a  
692 traditional test battery [31,40,50]. This approach will prioritise the cumulative  
693 understanding of a dog's context-dependent behaviour and help to guide decisions about  
694 the potential risk a dog poses to humans and other animals.

695

## 696 **Conclusion**

697 This study has tested the assumptions of local independence and measurement invariance  
698 of personality traits in shelter dogs. Using structural equation modelling, aggression  
699 across behavioural contexts was explained by two correlated latent variables and  
700 demonstrated repeatability. Nevertheless, significant residual covariances remained  
701 between certain behavioural contexts related to aggressiveness towards people, violating  
702 the assumption of local independence. In addition, aggression in different contexts

703 showed differential patterns of response across sex and age, indicating a lack of  
704 measurement invariance. Violations of local independence and measurement invariance  
705 imply that the aggressiveness towards people and dogs traits did not completely explain  
706 patterns of aggression in different contexts, or that inferences based on these  
707 hypothesised personality traits may in fact be misleading. We encourage researchers to  
708 more closely assess the measurement assumptions underlying reflective latent variable  
709 models before making conclusions about the effects of, or factors influencing,  
710 personality.

711

## 712 **Acknowledgements**

713 The authors are extremely grateful to Battersea Dogs and Cats Home for allowing us to  
714 access the data for this study.

## 715 **References**

- 716 1. Dochtermann NA, Jenkins SH. Behavioural syndromes in Merriam's kangaroo rats  
717 (*Dipodomys merriami*): a test of competing hypotheses. Proc R Soc B. 2007;274:  
718 2343–2349. doi:10.1098/rspb.2007.0622
- 719 2. Dochtermann NA, Dingemanse NJ. Behavioral syndromes as evolutionary  
720 constraints. Behav Ecol. 2013; art002. doi:10.1093/beheco/art002

- 721 3. Westneat DF, Wright J, Dingemanse NJ. The biology hidden inside residual within-  
722 individual phenotypic variation. *Biol Rev Camb Philos Soc.* 2015;90: 729–743.  
723 doi:10.1111/brv.12131
- 724 4. Réale D, Reader SM, Sol D, McDougall PT, Dingemanse NJ. Integrating animal  
725 temperament within ecology and evolution. *Biol Rev Camb Philos Soc.* 2007;82:  
726 291–318. doi:10.1111/j.1469-185X.2007.00010.x
- 727 5. Sih A, Bell AM, Johnson JC, Ziemba RE. Behavioral syndromes: an integrative  
728 overview. *Q Rev Biol.* 2004;79: 241–277. doi:10.1086/422893
- 729 6. Budaev DS. How many dimensions are needed to describe temperament in animals: a  
730 factor reanalysis of two data sets. *Int J Comp Psychol.* <http://cogprints.org/5478/>;  
731 1998.
- 732 7. Spearman C. “General intelligence,” objectively determined and measured. *Am J*  
733 *Psychol.* 1904;15: 201–292. doi:10.2307/1412107
- 734 8. Beaujean AA. Latent variable modeling using R: A step-by-step guide. New York:  
735 Routledge; 2014.
- 736 9. Bollen KA. Latent variables in psychology and the social sciences. *Annu Rev*  
737 *Psychol.* 2002;53: 605–634. doi:10.1146/annurev.psych.53.100901.135239
- 738 10. Borsboom D. The attack of the psychometricians. *Psychometrika.* 2006;71: 425–440.  
739 doi:10.1007/s11336-006-1447-6

- 740 11. Bollen K, Lennox R. Conventional wisdom on measurement: a structural equation  
741 perspective. *Psychol Bull.* 1991;110: 305–314. doi:10.1037/0033-2909.110.2.305
- 742 12. Budaev SV. Using principal components and factor analysis in animal behaviour  
743 research: caveats and guidelines. *Ethology.* 2010;116: 472–480. doi:10.1111/j.1439-  
744 0310.2010.01758.x
- 745 13. Dingemanse NJ, Dochtermann N, Wright J. A method for exploring the structure of  
746 behavioural syndromes to allow formal comparison within and between data sets.  
747 *Anim Behav.* 2010;79: 439–450. doi:10.1016/j.anbehav.2009.11.024
- 748 14. Fabrigar LR, Wegener DT, MacCallum RC, Strahan EJ. Evaluating the use of  
749 exploratory factor analysis in psychological research. *Psychol Methods.* 1999;4: 272–  
750 299. doi:10.1037/1082-989X.4.3.272
- 751 15. Preacher KJ, MacCallum RC. Repairing Tom Swift’s electric factor analysis  
752 machine. *Understanding Statistics.* 2003;2: 13–43.  
753 doi:10.1207/S15328031US0201\_02
- 754 16. Araya-Ajoy YG, Dingemanse NJ. Characterizing behavioural “characters”: An  
755 evolutionary framework. *Proc R Soc B.* 2014;281: 20132645.  
756 doi:10.1098/rspb.2013.2645
- 757 17. Arden R, Adams MJ. A general intelligence factor in dogs. *Intelligence.* 2016;55: 79–  
758 85. doi:10.1016/j.intell.2016.01.008
- 759 18. van den Berg SM, Heuven HCM, van den Berg L, Duffy DL, Serpell JA. Evaluation  
760 of the C-BARQ as a measure of stranger-directed aggression in three common dog

- 761 breeds. *Appl Anim Behav Sc.* 2010;124: 136–141.  
762 doi:10.1016/j.applanim.2010.02.005
- 763 19. Martin JS, Suarez SA. Personality assessment and model comparison with behavioral  
764 data: a statistical framework and empirical demonstration with bonobos (*Pan*  
765 *paniscus*). *Am J Primatol.* 2017;9999: e22670. doi: 10.1002/ajp.22670
- 766 20. Bartholomew DJ. Factor analysis for categorical data. *J R Stat Soc Series B Stat*  
767 *Methodol.* 1980;42: 293–321. <http://www.jstor.org/stable/2985165>
- 768 21. Markus KA, Borsboom D. *Frontiers of test validity theory: Measurement, causation,*  
769 *and meaning.* 1st ed. New York, N.Y: Routledge; 2013.
- 770 22. Drasgow F. Study of the measurement bias of two standardized psychological tests.  
771 *Journal of Applied Psychology.* 1987;72: 19–29. doi:10.1037/0021-9010.72.1.19
- 772 23. Mellenbergh GJ. Item bias and item response theory. *Int J Educ Res.* 1989;13: 127–  
773 143. doi:10.1016/0883-0355(89)90002-5
- 774 24. Meredith W. Measurement invariance, factor analysis and factorial invariance.  
775 *Psychometrika.* 1993;58: 525–543. doi:10.1007/BF02294825
- 776 25. Reise SP, Widaman KF, Pugh RH. Confirmatory factor analysis and item response  
777 theory: two approaches for exploring measurement invariance. *Psychol Bull.*  
778 1993;114: 552–566. doi:10.1037/0033-2909.114.3.552
- 779 26. Jansen BRJ, van der Maas HLJ. Statistical test of the rule assessment methodology by  
780 latent class analysis. *Dev Rev.* 1997;17: 321–357. doi:10.1006/drev.1997.0437

- 781 27. Wicherts JM, Dolan CV. Measurement invariance in confirmatory factor analysis: an  
782 illustration using IQ test performance of minorities. *Educ Meas Issues Pract.* 2010;29:  
783 39–47. doi:10.1111/j.1745-3992.2010.00182.x
- 784 28. Goddard ME, Beilharz RG. Genetic and environmental factors affecting the  
785 suitability of dogs as Guide Dogs for the Blind. *Theor Appl Genet.* 1982;62: 97–102.  
786 doi:10.1007/BF00293339
- 787 29. Hsu Y, Serpell JA. Development and validation of a questionnaire for measuring  
788 behavior and temperament traits in pet dogs. *J Am Vet Med Assoc.* 2003;223: 1293–  
789 1300. doi:10.2460/javma.2003.223.1293
- 790 30. Scott JP, Fuller JL. *Genetics and the social behavior of the dog.* University of  
791 Chicago Press; 2012.
- 792 31. Rayment DJ, Groef BD, Peters RA, Marston LC. Applied personality assessment in  
793 domestic dogs: limitations and caveats. *Appl Anim Behav Sci.* 2015;163: 1–18.  
794 doi:10.1016/j.applanim.2014.11.020
- 795 32. Persson ME, Wright D, Roth LSV, Batakis P, Jensen P. Genomic regions associated  
796 with interspecies communication in dogs contain genes related to human social  
797 disorders. *Sci Rep.* 2016;6. doi:10.1038/srep33439
- 798 33. Sundman A-S, Johnsson M, Wright D, Jensen P. Similar recent selection criteria  
799 associated with different behavioural effects in two dog breeds. *Genes Brain Behav.*  
800 2016;15: 750–756. doi:10.1111/gbb.12317

- 801 34. Barnard S, Marshall-Pescini S, Pelosi A, Passalacqua C, Prato-Previde E, Valsecchi  
802 P. Breed, sex, and litter effects in 2-month old puppies' behaviour in a standardised  
803 open-field test. *Sci Rep.* 2017;7: 1 – 8. doi:10.1038/s41598-017-01992-x.
- 804 35. Svartberg K. Breed-typical behaviour in dogs – historical remnants or recent  
805 constructs? *Appl Anim Behav Sci.* 2006;96: 293 – 313. doi:  
806 10.1016/j.applanim.2005.06.014
- 807 36. Jones AC, Gosling SD. Temperament and personality in dogs (*Canis familiaris*): a  
808 review and evaluation of past research. *Appl Anim Behav Sci.* 2005;95: 1–53.  
809 doi:10.1016/j.applanim.2005.04.008
- 810 37. Fratkin JL, Sinn DL, Patall EA, Gosling SD. Personality consistency in dogs: a meta-  
811 analysis. *PLOS ONE.* 2013;8: e54907. doi:10.1371/journal.pone.0054907
- 812 38. Posluns JA, Anderson RE, Walsh CJ. Comparing two canine personality assessments:  
813 convergence of the MCPQ-R and DPQ and consensus between dog owners and dog  
814 walkers. *Appl Anim Behav Sci.* doi:10.1016/j.applanim.2016.12.013
- 815 39. Bennett SL, Litster A, Weng H-Y, Walker SL, Luescher AU. Investigating behavior  
816 assessment instruments to predict aggression in dogs. *Appl Anim Behav Sci.*  
817 2012;141: 139–148. doi:10.1016/j.applanim.2012.08.005
- 818 40. Mohan-Gibbons H, Weiss E, Slater M. Preliminary investigation of food guarding  
819 behavior in shelter dogs in the United States. *Animals.* 2012;2: 331–346.  
820 doi:10.3390/ani2030331

- 821 41. Mornement KM, Coleman GJ, Toukhsati SR, Bennett PC. Evaluation of the  
822 predictive validity of the Behavioural Assessment for Re-homing K9's (B.A.R.K.)  
823 protocol and owner satisfaction with adopted dogs. *Appl Anim Behav Sci.* 2015;167:  
824 35–42. doi:10.1016/j.applanim.2015.03.013
- 825 42. Riemer S, Müller C, Virányi Z, Huber L, Range F. The predictive value of early  
826 behavioural assessments in pet dogs: a longitudinal study from neonates to adults.  
827 *PLOS ONE.* 2014;9: e101237. doi:10.1371/journal.pone.0101237
- 828 43. Wilsson E, Sundgren P-E. Behaviour test for eight-week old puppies: heritabilities of  
829 tested behaviour traits and its correspondence to later behaviour. *Appl Anim Behav*  
830 *Sci.* 1998;58: 151–162. doi:10.1016/S0168-1591(97)00093-2
- 831 44. Goodloe LP, Borchelt PL. Companion dog temperament traits. *J Appl Anim Welf*  
832 *Sci.* 1998;1: 303–338. doi:10.1207/s15327604jaws0104\_1
- 833 45. Jones AC. Development and validation of a dog personality questionnaire. Doctoral  
834 Thesis. University of Texas at Austin. 2008. [http://gosling.psy.utexas.edu/wp-](http://gosling.psy.utexas.edu/wp-content/uploads/2014/10/Amanda-Claire-Jones-Diss-2008.pdf)  
835 [content/uploads/2014/10/Amanda-Claire-Jones-Diss-2008.pdf](http://gosling.psy.utexas.edu/wp-content/uploads/2014/10/Amanda-Claire-Jones-Diss-2008.pdf)
- 836 46. Orritt R. Dog bites: a complex public health issue. *Vet Rec.* 2015;176: 640–641.  
837 doi:10.1136/vr.h3215
- 838 47. Svartberg K. Shyness-boldness predicts performance in working dogs. *Appl Anim*  
839 *Behav Sci.* 2002;79: 157–174. doi:10.1016/S0168-1591(02)00120-X
- 840 48. Taylor KD, Mills DS. The development and assessment of temperament tests for  
841 adult companion dogs. *J Vet Behav.* 2006;1: 94–108. doi:10.1016/j.jveb.2006.09.002



- 842 49. Haverbeke A, Plujimakers J, Diederich C. Behavioral evaluations of shelter dogs:  
843 literature review, perspectives, and follow-up within the European member state's  
844 legislation with emphasis on the Belgian situation. *J Vet Behav.* 2015;10: 5 – 11. doi:  
845 10.1016/j.jveb.2014.07.004
- 846 50. Patronek GJ, Bradley J. No better than flipping a coin: reconsidering canine behavior  
847 evaluations in animal shelters. *J Vet Behav.* 2016;15: 66–77.  
848 doi:10.1016/j.jveb.2016.08.001
- 849 51. Edelen MOE, Reeve BB. Applying item response theory (IRT) modeling to  
850 questionnaire development, evaluation, and refinement. *Qual Life Res.* 2007;16: 5 –  
851 18. doi: 10.1007/s11136-007-9198-0
- 852 52. Casey RA, Loftus B, Bolster C, Richards GJ, Blackwell EJ. Human directed  
853 aggression in domestic dogs (*Canis familiaris*): occurrence in different contexts and  
854 risk factors. *Appl Anim Behav Sci.* 2014;152: 52–63.  
855 doi:10.1016/j.applanim.2013.12.003
- 856 53. Hsu Y, Sun L. Factors associated with aggressive responses in pet dogs. *Appl Anim  
857 Behav Sci.* 2010;123: 108–123. doi:10.1016/j.applanim.2010.01.013
- 858 54. Sherman CK, Reisner IR, Taliaferro LA, Houpt KA. Characteristics, treatment, and  
859 outcome of 99 cases of aggression between dogs. *Appl Anim Behav Sci.* 1996;47:  
860 91–108. doi:10.1016/0168-1591(95)01013-0

- 861 55. Asp HE, Fikse WF, Nilsson K, Strandberg E. Breed differences in everyday  
862 behaviour of dogs. *Appl Anim Behav Sci.* 2015;169: 69–77.  
863 doi:10.1016/j.applanim.2015.04.010
- 864 56. Voith VL, Trevejo R, Dowling-Guyer S, Chadik C, Marder A, Johnson V, et al.  
865 Comparison of visual and DNA breed identification of dogs and inter-observer  
866 reliability. *Sociology.* 2013;3: 17–29. doi: 10.5923/j.sociology.20130302.02
- 867 57. Olson KR, Levy JK, Norby B, Crandall MM, Broadhurst JE, Jacks S, Barton RC,  
868 Zimmerman MS. Inconsistent identification of pit bull-type dogs by shelter staff. *Vet*  
869 *J.* 2015;206: 197 – 202. doi:10.1016/j.tvjl.2015.07.019
- 870 58. Simpson RJ, Simpson K, VanKavage L. Rethinking dog breed identification in  
871 veterinary practice. *J Am Vet Med Assoc.* 2012;241: 1163 – 1166. doi:  
872 10.2460/javma.241.9.1163
- 873 59. Owczarczak-Garstecka, SC, Burman OHP. Can sleep and resting behaviour be used  
874 as indicators of welfare in shelter dogs (*Canis lupus familiaris*)? *PLOS ONE.*  
875 2016;11: e0163620. doi:10.1371/journal.pone.0163620
- 876 60. R Development Core Team. R: a language and environment for statistical computing.  
877 Vienna, Austria: R Foundation for Statistical Computing; 2016. [https://www.r-](https://www.r-project.org/)  
878 [project.org/](https://www.r-project.org/)
- 879 61. Honaker J, King G, Blackwell M. Amelia: A program for missing data. 2015. Version  
880 1.7.4. <https://cran.r-project.org/web/packages/Amelia/vignettes/amelia.pdf>

- 881 62. Rosseel, Y., Oberski, D., Byrnes, J., Vanbrabant, L., Savalei, V., Merkle, E., et al,  
882 Lavaan: Latent Variable Analysis. 2016. Version 0.5-22. [https://cran.r-](https://cran.r-project.org/web/packages/lavaan/)  
883 [project.org/web/packages/lavaan/](https://cran.r-project.org/web/packages/lavaan/)
- 884 63. Muthén B, Christoffersson A. Simultaneous factor analysis of dichotomous variables  
885 in several groups. *Psychometrika*. 1981;46: 407–419. doi:10.1007/BF02293798
- 886 64. Muthén B. A general structural equation model with dichotomous, ordered  
887 categorical, and continuous latent variable indicators. *Psychometrika*. 1984;49: 115–  
888 132. doi:10.1007/BF02294210
- 889 65. Jorgensen TD, Pornprasertmanit S, Miller P, Schoemann A, Rosseel Y, Quick C, et  
890 al. *semTools: useful tools for structural equation modeling*. 2016.  
891 <https://rdrr.io/cran/semTools/>
- 892 66. Hermida R. The problem of allowing correlated errors in structural equation  
893 modeling: concerns and considerations. *Comp Method Soc Sci*. 2015;3: 05–17.
- 894 67. Kamata A. Item analysis by the hierarchical generalized linear model. *J Educ Meas*.  
895 2001;38: 79–93. doi:10.1111/j.1745-3984.2001.tb01117.x
- 896 68. Van den Noortgate W, De Boeck P. Assessing and explaining differential item  
897 functioning using logistic mixed models. *J Educ Behav Stat*. 2005;30: 443–464.
- 898 69. Nakagawa S, Schielzeth H. Repeatability for Gaussian and non-Gaussian data: a  
899 practical guide for biologists. *Biol Rev Camb Philos Sci*. 2010;85: 935–956.  
900 doi:10.1111/j.1469-185X.2010.00141.x

- 901 70. Stan Development Team. Stan modeling language users guide and reference manual.  
902 2016. Version 2.15.0. [https://github.com/stan-](https://github.com/stan-dev/stan/releases/download/v2.14.0/stan-reference-2.14.0.pdf)  
903 [dev/stan/releases/download/v2.14.0/stan-reference-2.14.0.pdf](https://github.com/stan-dev/stan/releases/download/v2.14.0/stan-reference-2.14.0.pdf)
- 904 71. Kruschke JK. Bayesian data analysis. *Wiley Interdiscip Rev: Cogn Sci.* 2010;1: 658–  
905 676. doi:10.1002/wcs.72
- 906 72. Vehtari A, Gelman A, Gabry J, Piironen J, Goodrich B. Loo: Efficient leave-one-out  
907 cross-validation and WAIC for Bayesian models. 2016. Version 1.0.0. [https://cran.r-](https://cran.r-project.org/web/packages/loo/loo.pdf)  
908 [project.org/web/packages/loo/loo.pdf](https://cran.r-project.org/web/packages/loo/loo.pdf)
- 909 73. Kruschke J. *Doing Bayesian data analysis: A tutorial with R, JAGS, and Stan.* 2nd ed.  
910 Academic Press; 2014.
- 911 74. Chen JJ, Tsong Y, Kang S-H. Tests for equivalence or noninferiority between two  
912 proportions. *Drug Inf J.* 2000;34: 569–578. doi:10.1177/009286150003400225
- 913 75. Budaev S, Brown C. Personality traits and behaviour. In: Brown C, Laland K, Krause  
914 J, editors. *Fish cognition and behavior.* Wiley-Blackwell; 2011. pp. 135–165.
- 915 76. Campbell DT, Fiske DW. Convergent and discriminant validation by the multitrait-  
916 multimethod matrix. *Psychol Bull.* 1959;56: 81–105. doi:10.1037/h0046016
- 917 77. Carter AJ, Feeney WE, Marshall HH, Cowlshaw G, Heinsohn R. Animal personality:  
918 what are behavioural ecologists measuring? *Biol Rev Camb Philos Soc.* 2013;88:  
919 465–475. doi:10.1111/brv.12007

- 920 78. Podsakoff PM, MacKenzie SB, Lee J-Y, Podsakoff NP. Common method biases in  
921 behavioral research: a critical review of the literature and recommended remedies. *J*  
922 *Appl Psychol.* 2003;88: 879–903. doi:10.1037/0021-9010.88.5.879
- 923 79. Cole DA, Ciesla JA, Steiger JH. The insidious effects of failing to include design-  
924 driven correlated residuals in latent-variable covariance structure analysis. *Psychol*  
925 *Methods.* 2007;12: 381–398. doi:10.1037/1082-989X.12.4.381
- 926 80. Yen WM. Scaling performance assessments: strategies for managing local item  
927 dependence. *J Educ Meas.* 1993;30: 187–213. doi:10.1111/j.1745-  
928 3984.1993.tb00423.x
- 929 81. Carter AJ, Marshall HH, Heinsohn R, Cowlshaw G. How not to measure boldness:  
930 novel object and antipredator responses are not the same in wild baboons. *Anim*  
931 *Behav.* 2012;84: 603–609. doi:10.1016/j.anbehav.2012.06.015
- 932 82. Cramer AOJ, van der Sluis S, Noordhof A, Wichers M, Geschwind N, Aggen SH, et  
933 al. Dimensions of normal personality as networks in search of equilibrium: you can't  
934 like parties if you don't like people. *Eur J Pers.* 2012;26: 414–431.  
935 doi:10.1002/per.1866
- 936 83. Schmittmann VD, Cramer AOJ, Waldorp LJ, Epskamp S, Kievit RA, Borsboom D.  
937 Deconstructing the construct: a network perspective on psychological phenomena.  
938 *New Ideas Psychol.* 2013;31: 43–53. doi:10.1016/j.newideapsych.2011.02.007
- 939 84. Hamaker EL, Nesselroade JR, Molenaar PCM. The integrated trait-state model. *J Res*  
940 *Pers.* 2007;41: 295–315. doi:10.1016/j.jrp.2006.04.003

- 941 85. Duckworth RA. Neuroendocrine mechanisms underlying behavioral stability:  
942 implications for the evolutionary origin of personality. *Ann N Y Acad Sci.*  
943 2015;1360: 54–74. doi:10.1111/nyas.12797
- 944 86. Koski SE. How to measure animal personality and why does It matter? Integrating the  
945 psychological and biological approaches to animal personality. In: Inoue-Murayama  
946 M, Kawamura S, Weiss A, editors. *From Genes to Animal Behavior*. Springer Japan;  
947 2011. pp. 115–136. doi:10.1007/978-4-431-53892-9\_5
- 948 87. Borsboom D. *Measuring the mind: Conceptual issues in contemporary*  
949 *psychometrics*. Cambridge University Press; 2005.
- 950 88. Maul A, Torres Irribarra D, Wilson M. On the philosophical foundations of  
951 psychological measurement. *Measurement*. 2016;79: 311–320.  
952 doi:10.1016/j.measurement.2015.11.001
- 953 89. Molenaar PCM. A manifesto on psychology as idiographic science: bringing the  
954 person back into scientific psychology, this time forever. *Measurement*. 2004;2: 201–  
955 218. doi:10.1207/s15366359mea0204\_1
- 956 90. Adolf J, Schuurman NK, Borkenau P, Borsboom D, Dolan CV. Measurement  
957 invariance within and between individuals: a distinct problem in testing the  
958 equivalence of intra- and inter-individual model structures. *Front Psychol*. 2014;5.  
959 doi:10.3389/fpsyg.2014.00883

- 960 91. Stamps JA, Briffa M, Biro PA. Unpredictable animals: individual differences in  
961 intraindividual variability (IIV). *Anim Behav.* 2012;83: 1325–1334.  
962 doi:10.1016/j.anbehav.2012.02.017
- 963 92. Biro PA, Stamps JA. Using repeatability to study physiological and behavioural  
964 traits: ignore time-related change at your peril. *Anim Behav.* 2015;105: 223–230.  
965 doi:10.1016/j.anbehav.2015.04.008
- 966 93. Borsboom D, Cramer AO, Kievit RA, Zand Scholten A, Franic S. The end of  
967 construct validity. In Lissitz, R, editor. *The concept of validity.* Information Age  
968 Publishers; 2010. pp. 135–170.
- 969
- 970
- 971
- 972
- 973

## 974 **Supporting Information**

975 **Table S1. Counts of aggression per context.** The number of dogs who had 0, 1, and > 1  
976 observations of aggression while at the shelter.

977

978 **Table S2. Tetrachoric correlations between aggression contexts.** Tetrachoric  
979 correlations between aggression contexts on the raw binary data, before the multiple  
980 imputation. Abbreviations used: HND (*Handling*); FPL (*Interactions with familiar*  
981 *people*); UPL (*Interactions with unfamiliar people*); KD (*In kennel towards dogs*); KP (*In*  
982 *kennel towards people*); OKD (*Out of kennel towards dogs*); OKP (*Out of kennel towards*  
983 *people*); EAT (*Eating food*); TOY (*Interactions with toys*); DM (*Interactions with male*  
984 *dogs*); DF (*Interactions with female dogs*).

985

986 **Table S3. Bayesian hierarchical model parameter estimates for aggression towards**  
987 **people in different contexts.** Mean and 95% highest density interval (HDI) estimates for  
988 all parameters from the Bayesian hierarchical logistic model assessing measurement  
989 invariance for contexts reflecting aggressiveness towards people. Differences between  
990 levels of categorical variables are indicated by ‘.v.’ in the parameter name; interactions  
991 are denoted with ‘\*’ in the parameter name. The decision rule for each parameter is given  
992 except for those variables not interpreted inferentially: YES = 95% HDI falls completely  
993 outside the region of practical equivalence (ROPE); NULL = 95% HDI falls completely  
994 inside the ROPE; ROPE = 95% HDI partly covers the ROPE.



995

996 **Table S4. Bayesian hierarchical model parameter estimates for aggression towards**

997 **dogs in different contexts.** Mean and 95% highest density interval (HDI) estimates for

998 all parameters from the Bayesian hierarchical logistic model assessing measurement

999 invariance for contexts reflecting aggressiveness towards dogs. Differences between

1000 levels of categorical variables are indicated by ‘.v.’ in the parameter name; interactions

1001 are denoted with ‘\*’ in the parameter name. The decision rule for each parameter is given

1002 except for those variables not interpreted inferentially: YES = 95% HDI falls completely

1003 outside the region of practical equivalence (ROPE); NULL = 95% HDI falls completely

1004 inside the ROPE; ROPE = 95% HDI partly covers the ROPE.

1005
